# Supplementary material for: A novel approach for precisely controlled multiple cell patterning in microfluidic chips by inkjet printing and the detection of drug metabolism and diffusion
Source: Royal Society of Chemistry journal article supplement (doi:10.1039/c6an00395h), 2016-01-01
Supplement: c6an00395h1.pdf [file c6an00395h1.pdf]

## Supplementary Data

### **A Novel Approach for Precisely Controlled Multiple Cell Patterning in Microfluidic Chip by Inkjet Printing and the Study of Drug Metabolism and Diffusion**

**Jie Zhang,<sup>a</sup> Fengming Chen,<sup>a</sup> Ziyi He,<sup>a</sup> Yuan Ma,<sup>a</sup> Katsumi Uchiyama,<sup>b</sup> and Jin-Ming Lin<sup>a,c,\*</sup>**

*<sup>a</sup> Department of Chemistry, Beijing Key Laboratory of Microanalytical Methods and Instrumentation, The Key Laboratory of Bioorganic Phosphorus Chemistry & Chemical Biology, Tsinghua University, Beijing 100084, China*

*<sup>b</sup> Department of Applied Chemistry, Graduate School of Urban Environmental Sciences, Tokyo Metropolitan University, Minamiohsawa, Hachioji, Tokyo 192-0397, Japan*

*<sup>c</sup> Collaborative Innovation Center of Functionalized Probes for Chemical Imaging in University of Shandong, Shandong Normal University, Jinan 250014, China*

### Chemical transformation schematic of tegafur.

Tegafur was transformed into 5'-hydroxytegafur and then 5-FU in the liver cells by CYP enzyme. 5-FU diffused out from liver cells and got into cancer cells. 5-FU exhibits cytotoxicity by incorporation into RNA and DNA after transformed into FUTP or FdUTP respectively, as well as by inhibition of thymidylate synthase.

5-FU: 5-fluorouracil

FUTP: fluorouridine triphosphate

FdUTP: fluorodeoxyuridine triphosphate

FdUMP: fluorodeoxyuridine monophosphate

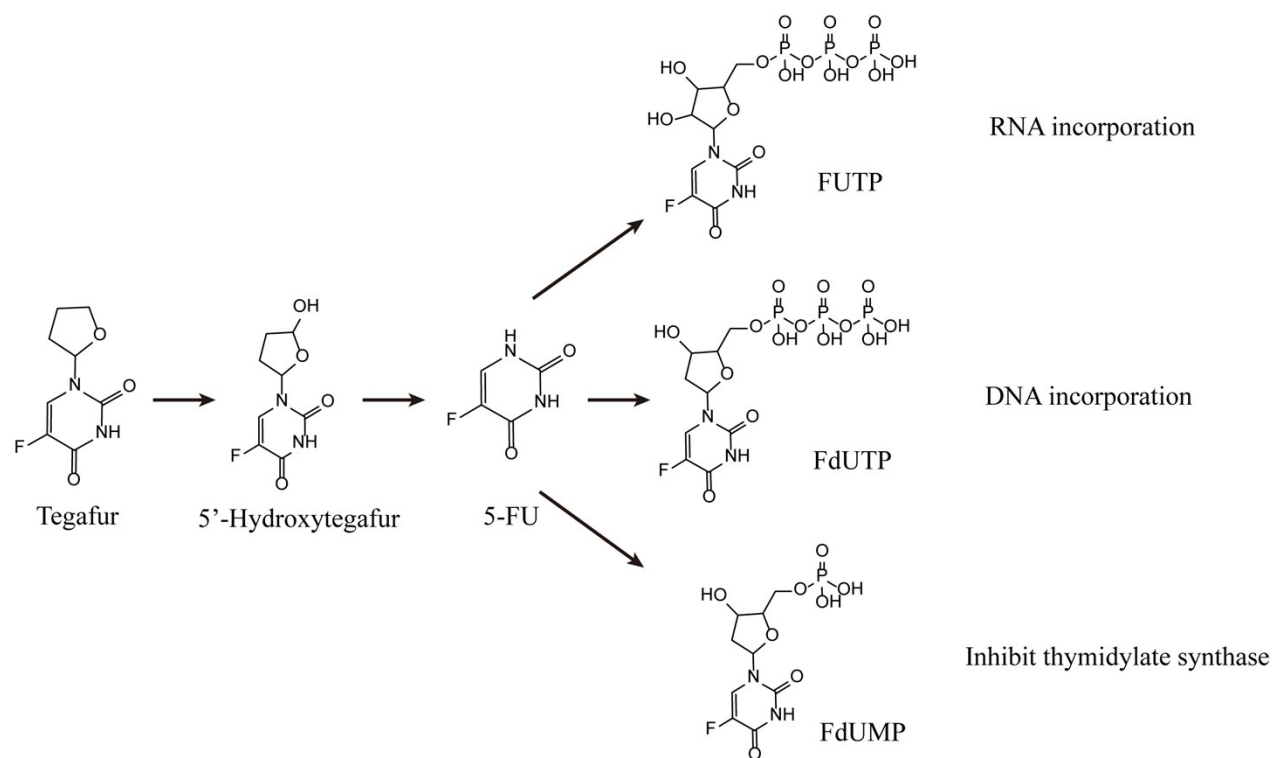

**Fig. S1** Chemical transformation schematic of tegafur.

## Design and size of the microchip.

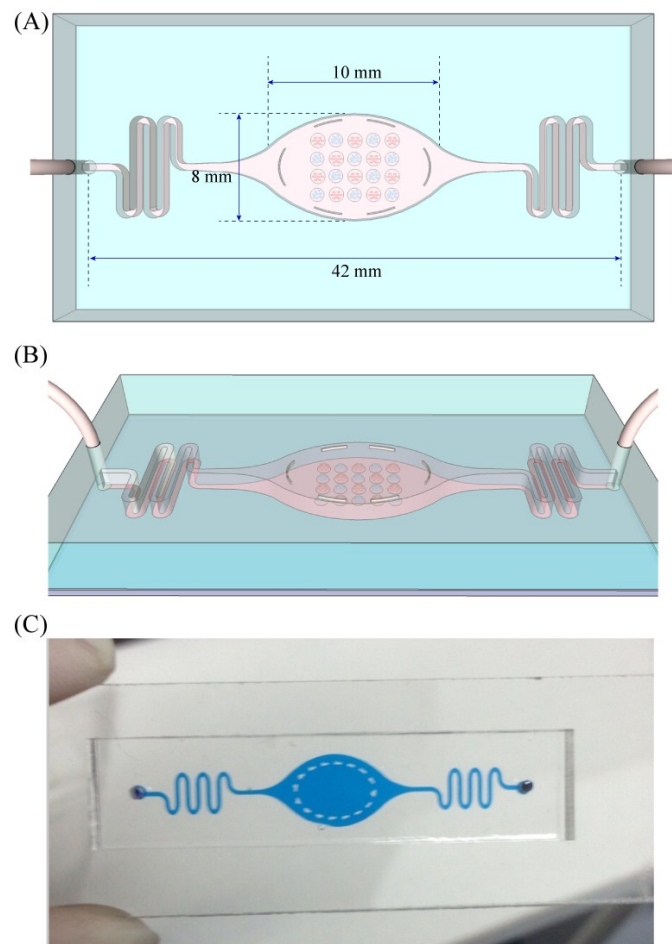

**Fig. S2** Design of the microchip. (A) size of the microchannel of the PDMS layer; (B) side view of the microchip; (C) real photo of the manufactured microchip.

### **Influence of alginate sodium solid content.**

The viscosity of commonly used alginate sodium for 3D cell culture was relatively too high for electronic inkjet printers, the 1.0% hydrogel drops failed to separate from the nozzle and accumulated at the outlet, while 0.5% alginate drops could be ejected smoothly.

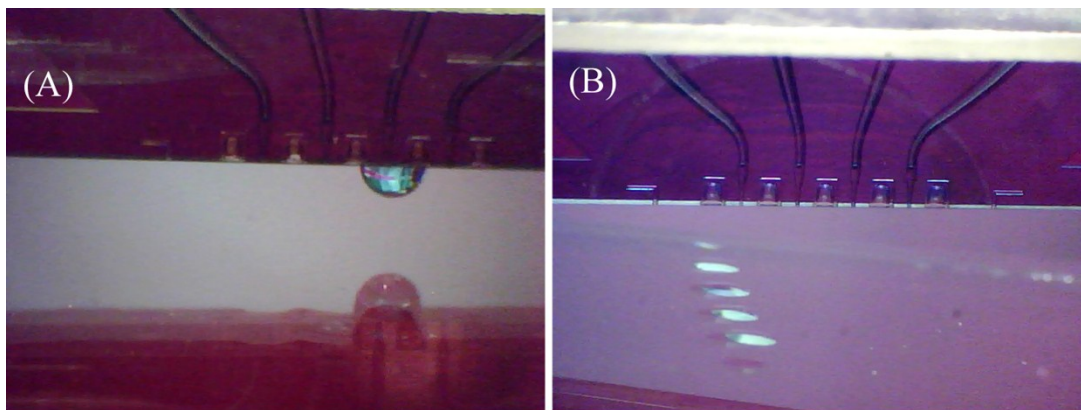

**Fig. S3** Inkjet printing of different solid content alginate sodium: (A) 1.0%; (B) 0.5%.

### **Influence of glass surface.**

Contact angle of alginate sodium on glass slides became smaller along with the increase of hydrophilicity.

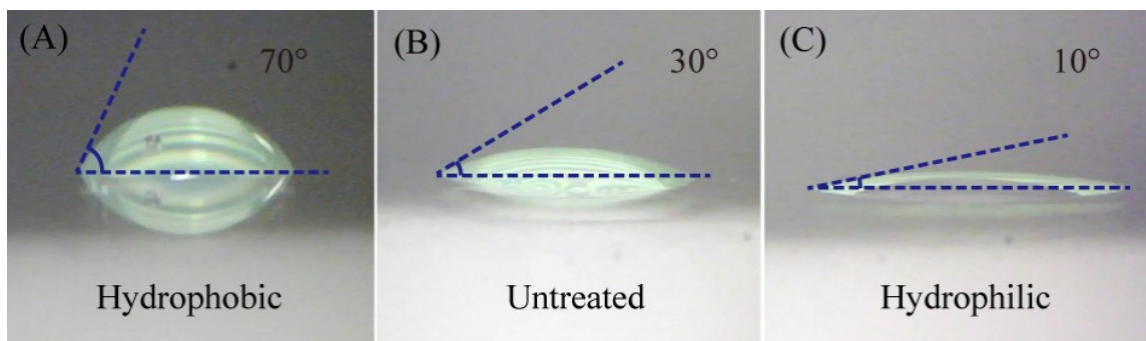

**Fig. S4** Contact angle of alginate sodium on glass slides of different hydrophilic-hydrophobic property.

### Co-patterning of two kinds of cells.

Two kinds of cells stained with different color were co-patterned in a cross way.

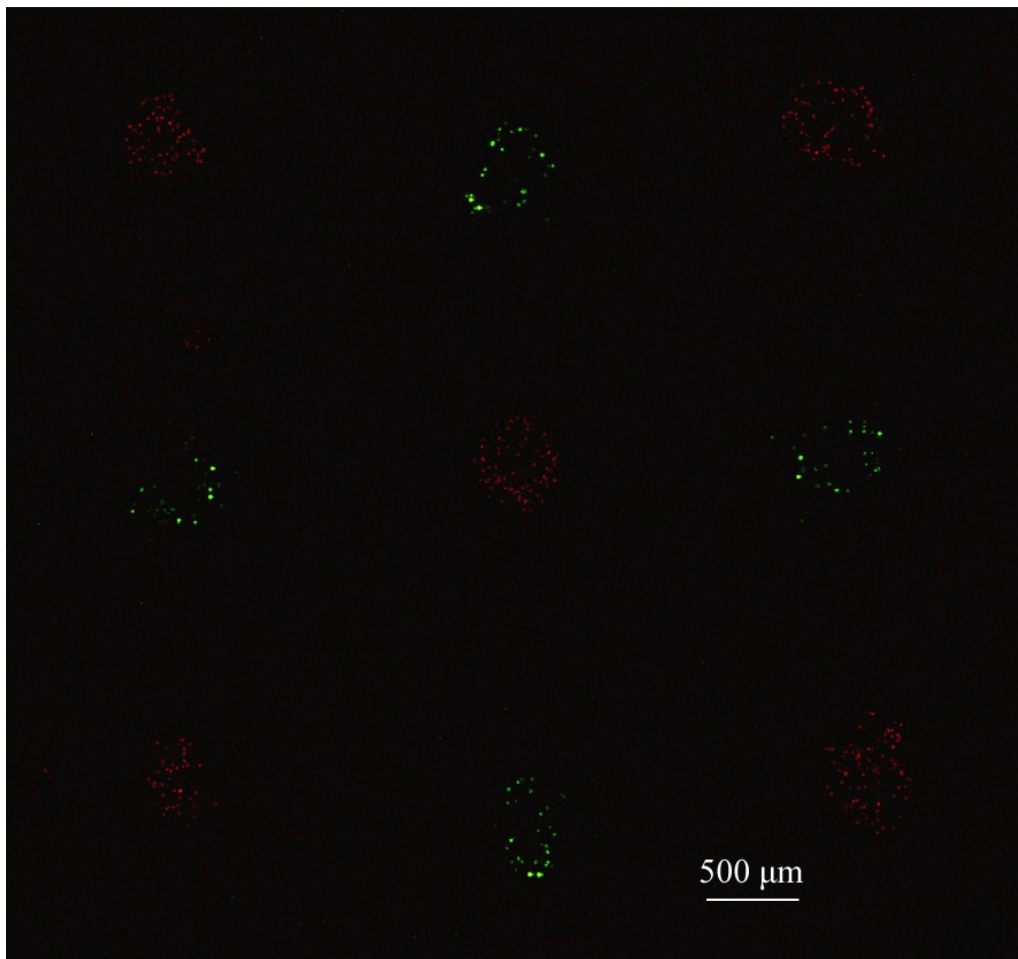

**Fig. S5** Co-patterning of two kinds of cells.

### Gelation of alginate sodium.

After printing of cells and integration with a PDMS layer, 100 mM  $\text{CaCl}_2$  dissolved in 1640 cell culture medium was injected into the microchip for the alginate gelation. Then normal 1640 cell culture medium was injected into the microchip to replace  $\text{CaCl}_2$  solution. **Fig. S6** showed the situation before and after hydrogel gelation.

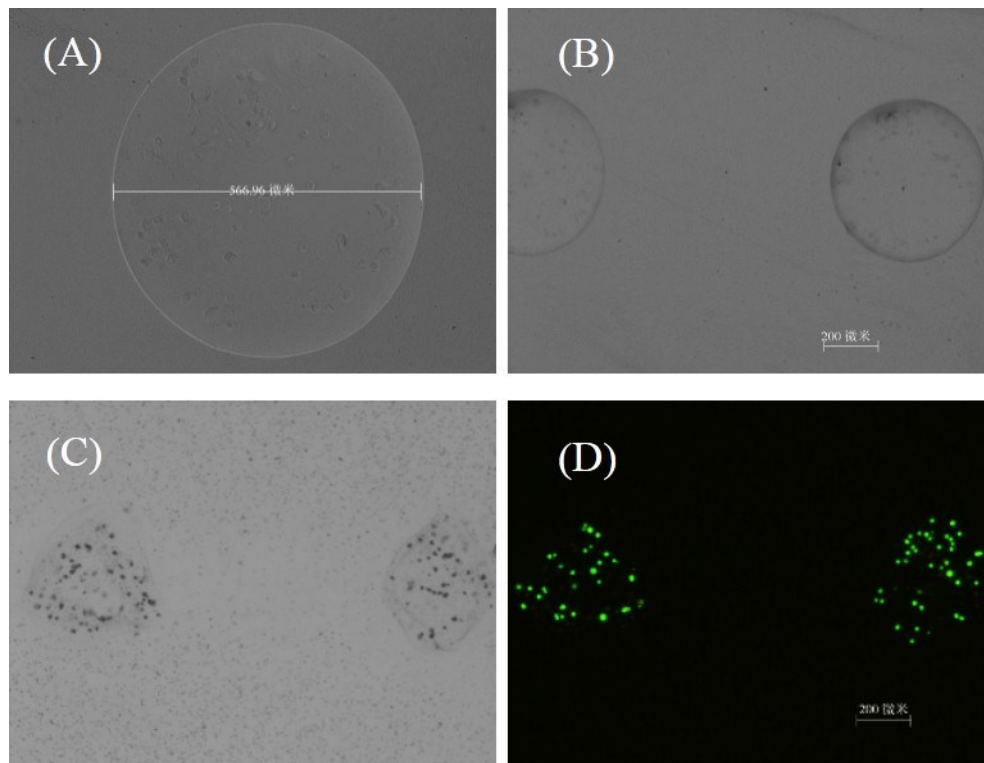

**Fig. S6** Inkjet printing alginate hydrogel drops (A) (B), and the situation after gelation (C) (D).

### Cell proliferation in alginate.

The cells kept good viability cultured in alginate hydrogel in the microchip and cell clusters were observed.

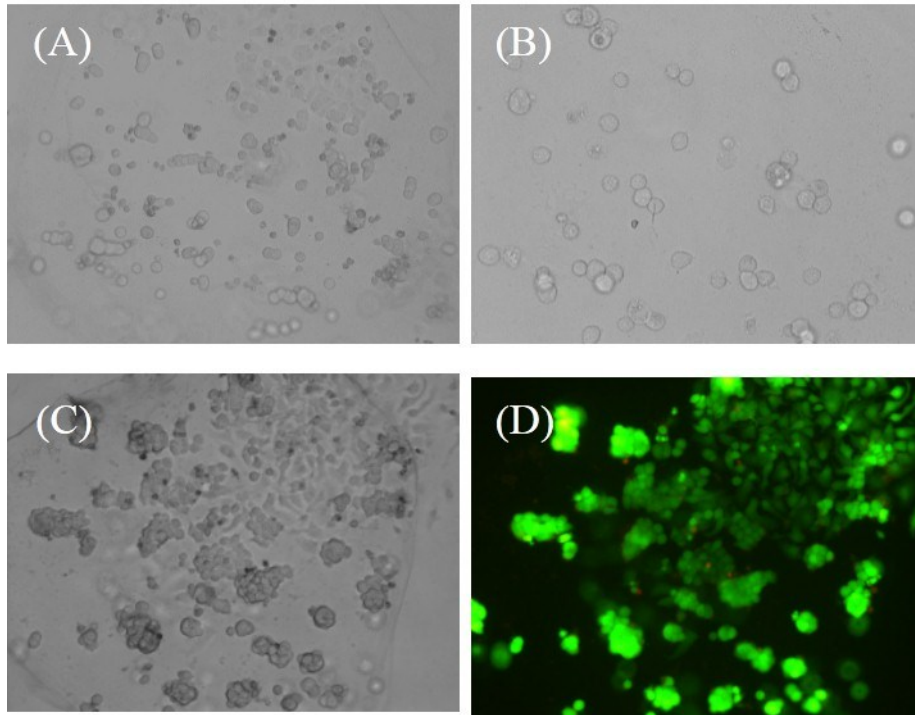

**Fig. S7** Cell proliferation in alginate hydrogel of HepG2 (A) cells and U251 (B) cells, and an Live/Dead assay comparison (C) (D).

## Cells just printed and after culture

Images of cells just printed and after a period of culture.

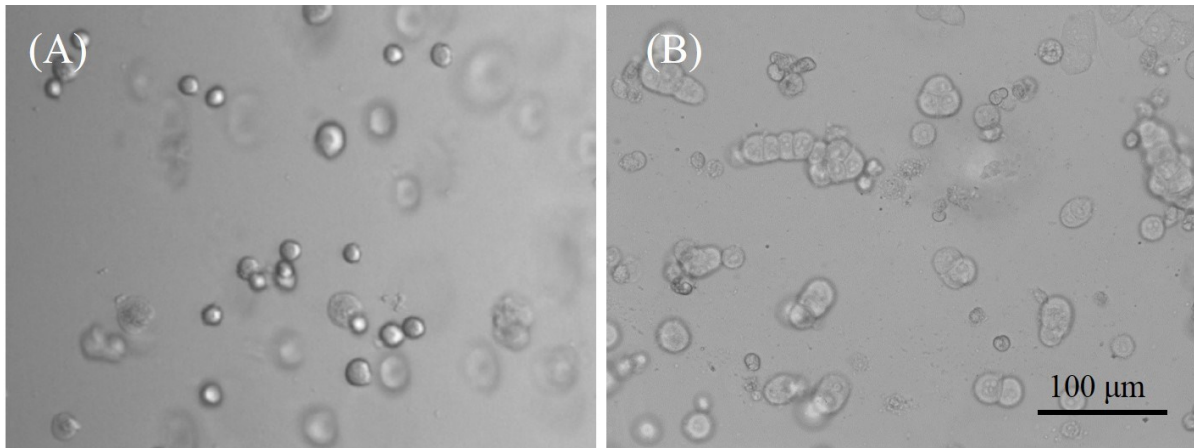

**Fig. S8** Cells just printed (A) and after a period of culture (B).



## Drug metabolism experiment

Supplementary figure of **Fig. 5** with separate colour channels indicating live cells and dead cells stained by Live/Dead assay kit.

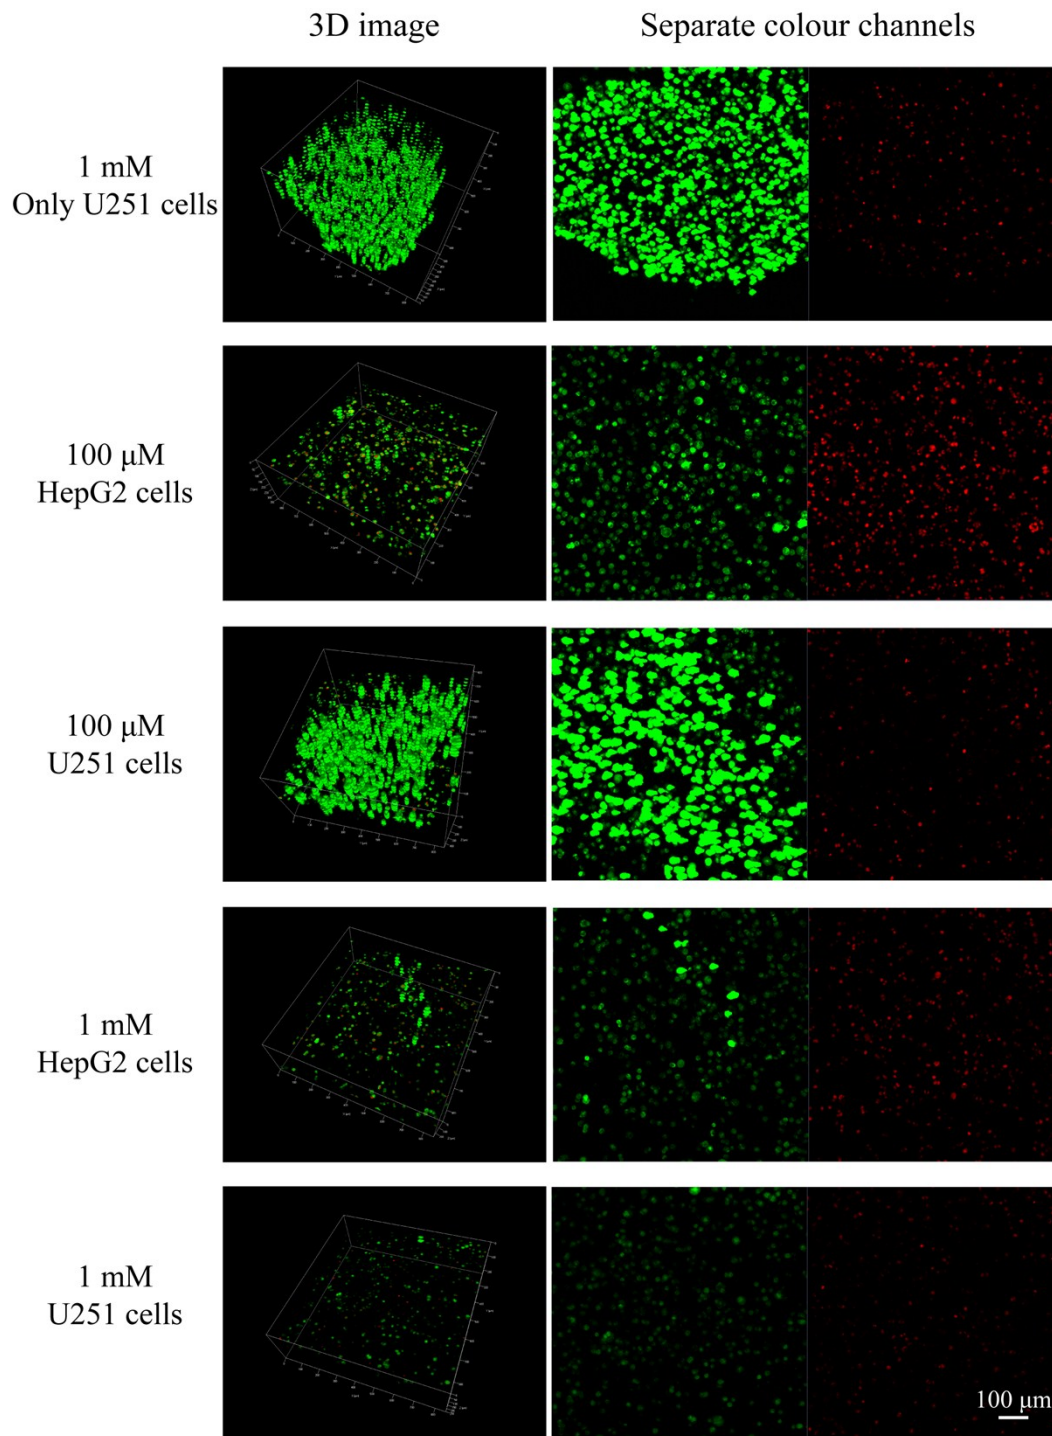

**Fig. S9** Live/Dead staining assay of HepG2-U251 co-culture system with different tegafur concentrations, with 3D images and separate colour channels;

## Diffusion equation

Here we adopted Fick's law of diffusion and used the software Comsol to simulate the diffusion situation.

In the Fick's law equations used here:

$$\frac{\partial c_j}{\partial t} + \nabla \cdot (-D_j \nabla c_j) + \mathbf{u} \cdot \nabla c_j = R_j$$

$$\mathbf{N}_j = -D_j \nabla c_j + \mathbf{u} c_j$$

The meaning of the parameters are: for species  $j$ ,  $c_j$  is the concentration,  $t$  is time,  $D_j$  is diffusion coefficient,  $\mathbf{u}$  is direction vector,  $R_j$  is diffusion flux,  $\mathbf{N}_j$  is the molar flux.

And here the diffusion coefficient was set as  $5 \times 10^{-6} \text{ cm}^2/\text{s}$  approximately according to the molecular weight of tegafur. And the calculation was processed by the software.
